# Supplementary material
Source: Elsevier journal article supplement (https://www.sciencedirect.com/science/article/pii/S0121812321000049)
Supplement: mmc1 [file S0121812321000049:mmc1.docx]

**Anexo 1. Cuestionario Servqhos**

Tenemos el interés de conocer el grado de satisfacción de los pacientes que, como usted, fueron atendidos por el servicio de reumatología en el Instituto Fernando Chalem. Para ello usaremos este cuestionario en el que le pedimos una valoración de los servicios prestados y el trato recibido. Su participación es VOLUNTARIA y ANÓNIMA.Para la realización solo debe marcar con una **X** si la calidad de la atención que se le ha proporcionado ha sido **MEJOR O PEOR DE LO QUE USTED ESPERABA** de acuerdo a la siguiente puntuación.

| **Mucho peor de lo que esperaba** | **Peor de lo que esperaba** | **Como me lo esperaba** | **Mejor de lo que esperaba** | **Mucho mejor de lo que esperaba** |
| --- | --- | --- | --- | --- |
| **1** | **2** | **3** | **4** | **5** |

| La tecnología de los equipos médicos para los diagnósticos y tratamientos | 1 | 2 | 3 | 4 | 5 |
| --- | --- | --- | --- | --- | --- |
| La apariencia del personal | 1 | 2 | 3 | 4 | 5 |
| Las indicaciones para orientarse en la institución | 1 | 2 | 3 | 4 | 5 |
| Si el personal cumple lo que dice que va a hacer | 1 | 2 | 3 | 4 | 5 |
| El estado en el que están los consultorios | 1 | 2 | 3 | 4 | 5 |
| El informe que los médicos proporcionan | 1 | 2 | 3 | 4 | 5 |
| El tiempo de espera para ser atendido por el médico | 1 | 2 | 3 | 4 | 5 |
| La facilidad para llegar al hospital | 1 | 2 | 3 | 4 | 5 |
| El interés del personal para solucionar los problemas de los pacientes | 1 | 2 | 3 | 4 | 5 |
| La puntualidad de las consultas médicas | 1 | 2 | 3 | 4 | 5 |
| La rapidez con la que se consigue lo que se necesita o se pide | 1 | 2 | 3 | 4 | 5 |
| La disposición del personal para ayudarle cuando lo necesita | 1 | 2 | 3 | 4 | 5 |
| La confianza (seguridad) que el médico transmite a los pacientes | 1 | 2 | 3 | 4 | 5 |
| La amabilidad (cortesía) del personal en su trato con la gente | 1 | 2 | 3 | 4 | 5 |
| La preparación del personal para realizar su trabajo | 1 | 2 | 3 | 4 | 5 |
| El trato personalizado que se da a sus pacientes | 1 | 2 | 3 | 4 | 5 |
| La capacidad del personal para comprender la necesidad de los pacientes | 1 | 2 | 3 | 4 | 5 |
| La información que los médicos dan a los familiares | 1 | 2 | 3 | 4 | 5 |
| El interés del personal no médico por los pacientes | 1 | 2 | 3 | 4 | 5 |
