# Supplementary material
Source: Elsevier journal article supplement (https://www.sciencedirect.com/science/article/pii/S0121812321000049)
Supplement: mmc2 [file S0121812321000049:mmc2.docx]

**Anexo 2 - Encuesta ecografía**

Tenemos el interés de conocer el grado de satisfacción de los pacientes que, como usted, fueron atendidos por el servicio de reumatología en el Instituto Fernando Chalem. Para ello usaremos este cuestionario en el que le pedimos una valoración de los servicios prestados y el trato recibido. Su participación es VOLUNTARIA y ANÓNIMA.

Para la realización solo debe marcar con una **X** según su precepción

| **Nada** | **Casi nada** | **Poco** | **más que poco** | **Mucho** |
| --- | --- | --- | --- | --- |
| **1** | **2** | **3** | **4** | **5** |

| Considera que la ecografía fue útil durante su consulta | 1 | 2 | 3 | 4 | 5 |
| --- | --- | --- | --- | --- | --- |
| Considera que la ecografía le da más seguridad de sus tratamientos | 1 | 2 | 3 | 4 | 5 |
| Considera que la ecografía gasta tiempo innecesariamente | 1 | 2 | 3 | 4 | 5 |
| Considera que la ecografía le da más seguridad de su medico | 1 | 2 | 3 | 4 | 5 |
| Considera que la ecografía mejora la atención | 1 | 2 | 3 | 4 | 5 |
